# Supplementary material
Source: Frontiers journal article supplement (https://www.frontiersin.org/articles/429789)

A

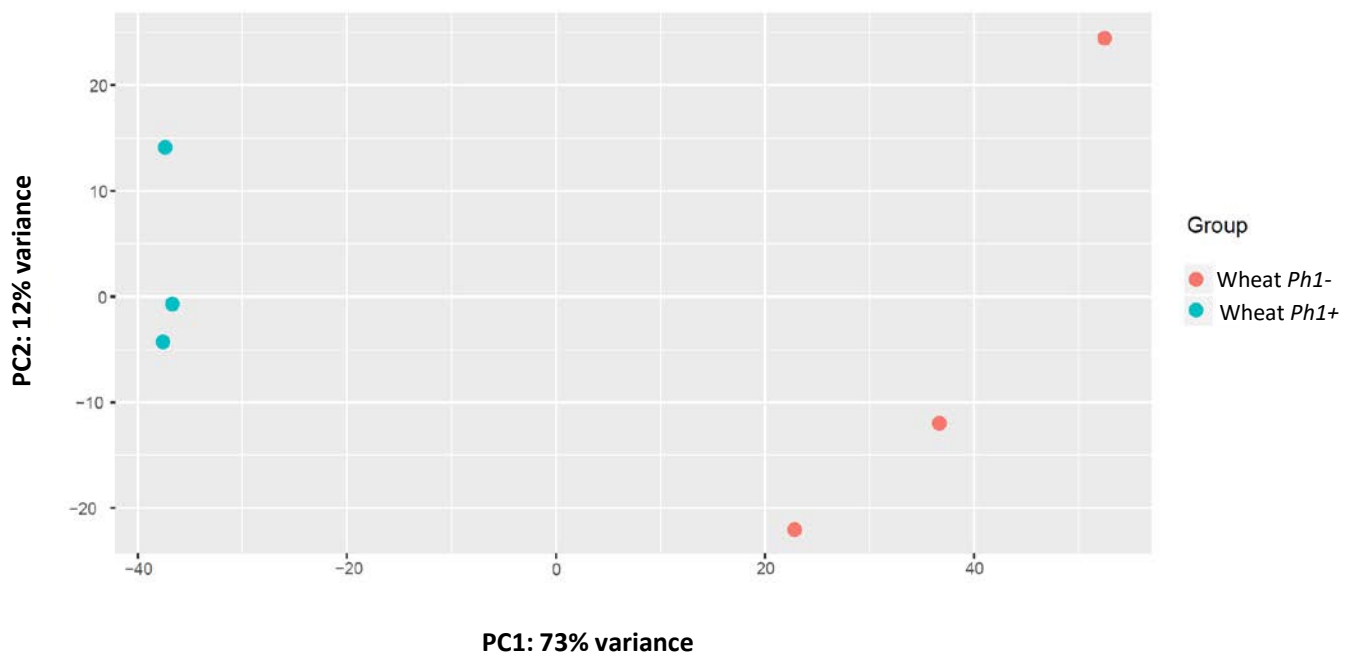

B

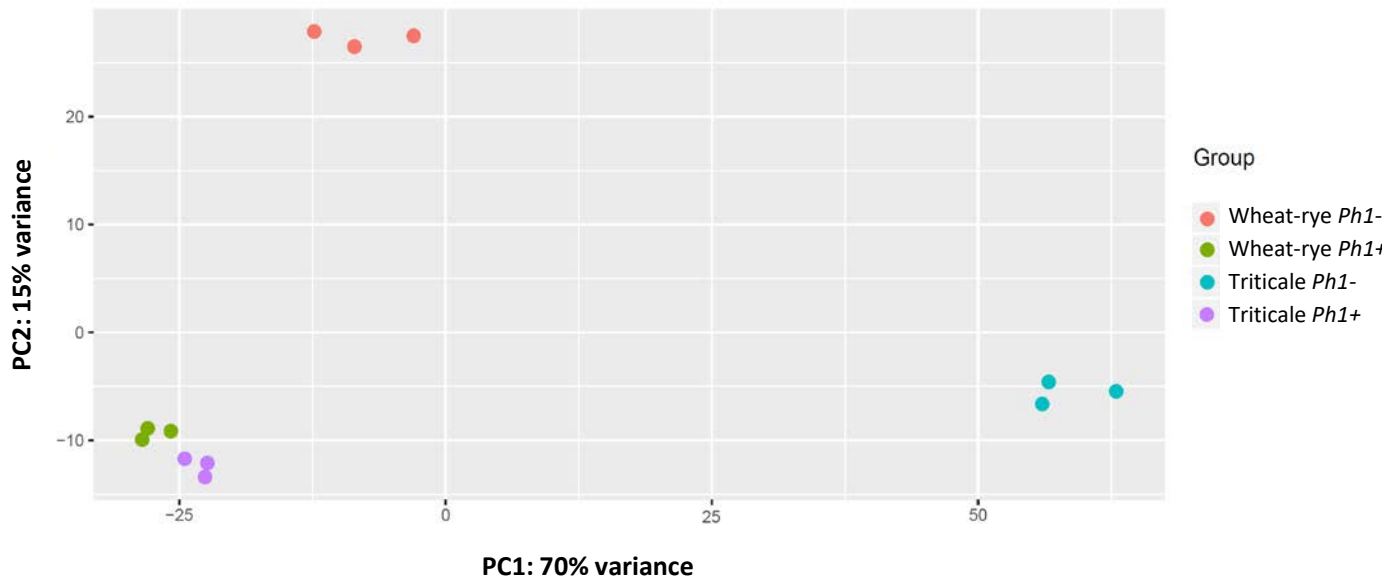

Supplement: Data_Sheet_1.PDF [file Data_Sheet_1.PDF]
