# Supplementary material
Source: Frontiers journal article supplement (https://www.frontiersin.org/articles/429789)

Wheat *Ph1+*  
vs.  
*wheat Ph1-* sample 1

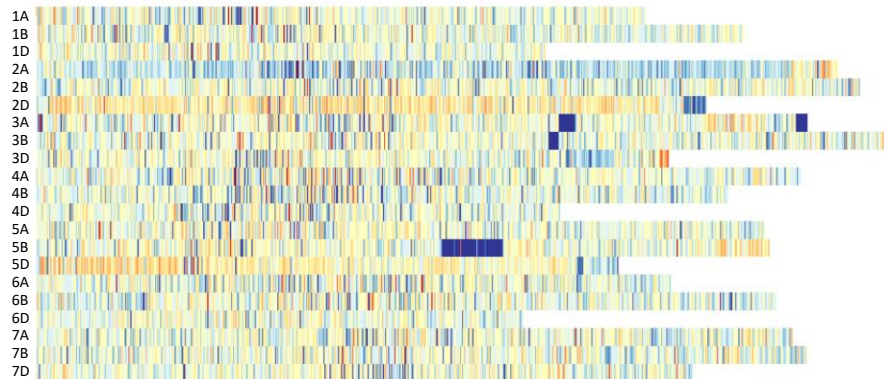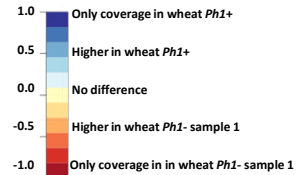

Wheat *Ph1+*  
vs.  
*wheat Ph1-* sample 2

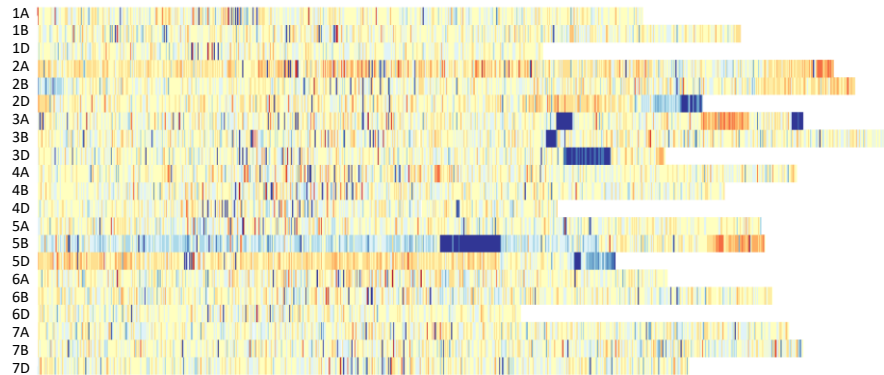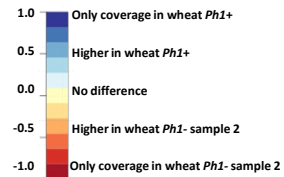

Wheat *Ph1+*  
vs.  
*wheat Ph1-* sample 3

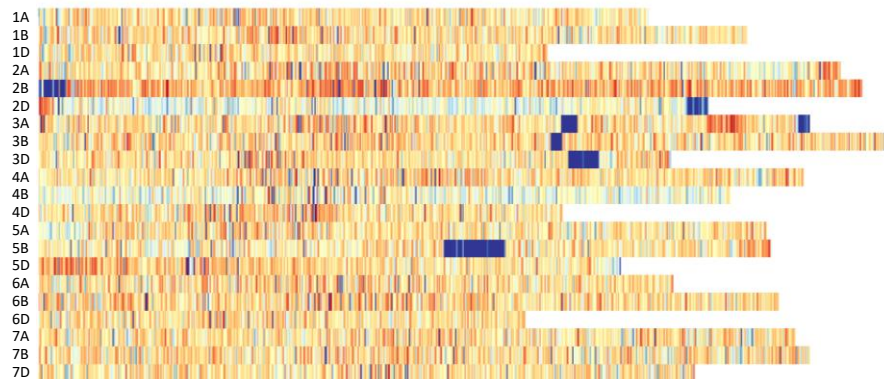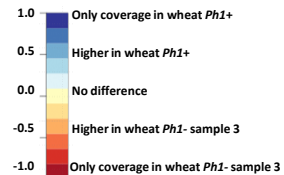

Supplement: Data_Sheet_3.PDF [file Data_Sheet_3.PDF]
